# Supplementary material
Source: Springer Nature journal article supplement (https://www.springermedizin.de/resource/supplementary/13058_2011_2873_MOESM4_ESM.pdf/9702762)

**A.**  
WT-Fc $\gamma$ R Mice

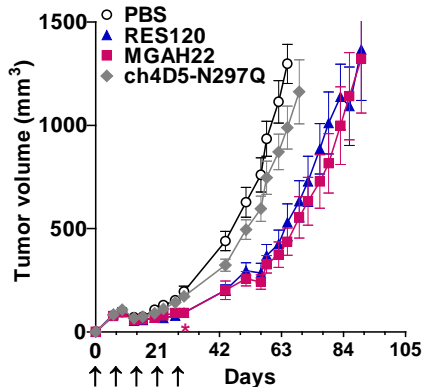

**B.**  
mCD16<sup>-/-</sup> Mice

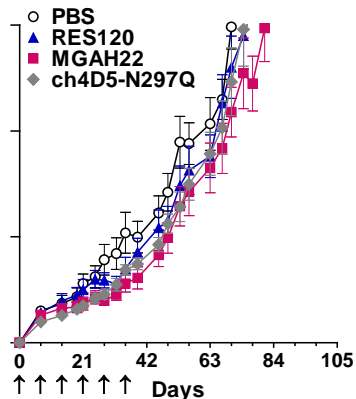

**C.**  
mCD16<sup>-/-</sup> hCD16A<sup>+</sup> Mice

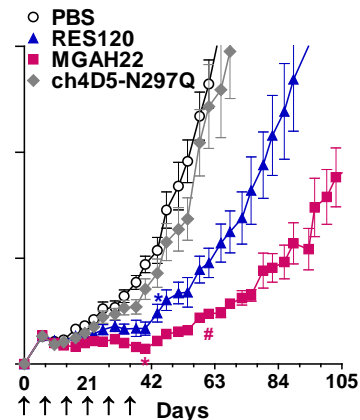

**D.**  
mCD16<sup>-/-</sup> hCD16A<sup>+</sup> Mice  
(RES120)

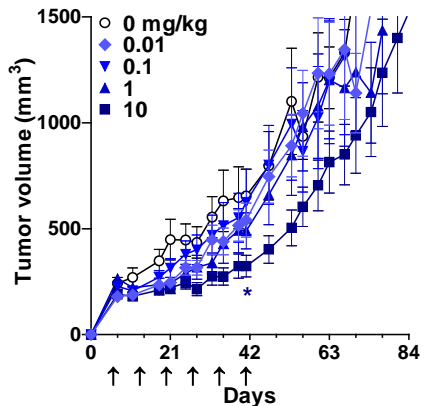

**E.**  
mCD16<sup>-/-</sup> hCD16A<sup>+</sup> Mice  
(MGAH22)

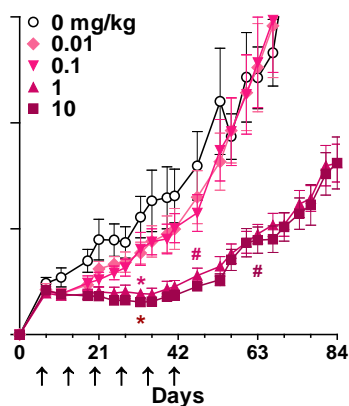

Supplement: MOESM4 [file 9702762]
